# Supplementary material
Source: PubMed Central journal article supplement (PMC8721524)
Supplement: NIHMS1760055-supplement-Supplementary_Data_1.pdf [file NIHMS1760055-supplement-Supplementary_Data_1.pdf]

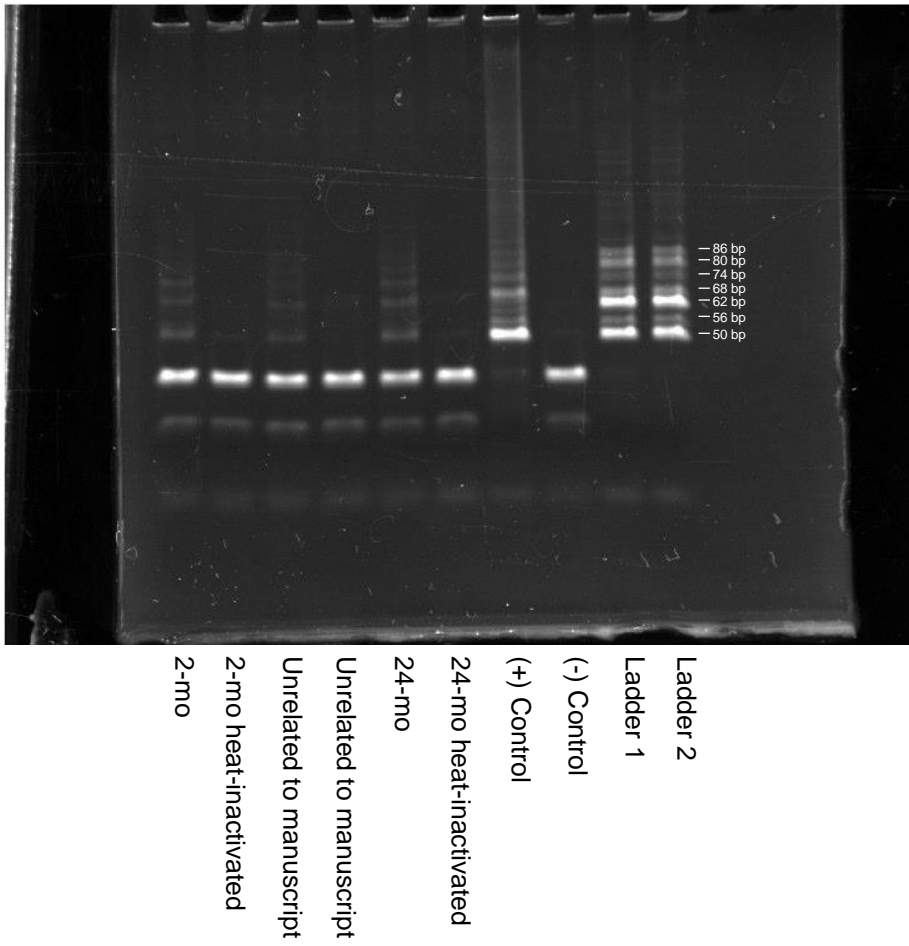

**Supplementary Data 1: Raw data for Extended Figure Data 6e.** The uncropped electrophoresis gel comparing telomerase activity between '2-mo' and '24-mo' SSCs.
